# Supplementary material for: Dissociating the effect of disruptive colouration on localisation and identification of camouflaged targets
Source: PubMed Central journal article supplement (PMC5920097; doi:10.1038/s41598-018-25014-6), 2018-04-26
Supplement: 41598_2018_25014_MOESM1_ESM.pdf [file 41598_2018_25014_MOESM1_ESM.pdf]

**Dissociating the effect of disruptive colouration on localisation and identification of camouflaged targets.**

**Rebecca J. Sharman<sup>1</sup>,**

**Stephen Moncrieff<sup>2</sup>,**

**Paul George Lovell<sup>2</sup>.**

- 1. University of Stirling, School of Psychology, Bridge of Allan, FK9 4LA**
- 2. Abertay University, Division of Psychology, School of Social and Health Sciences, 1, Bell St, Dundee, DD1 1HG**

**Supplementary Materials.**

Table S1: Bayesian ANOVA analysis of results

**Model Comparison - dependent**

| <b>Models</b>                                                                                 | <b>P(M)</b> | <b>P(M   data)</b> | <b>Log(BF<sub>M</sub>)</b> | <b>Log(BF<sub>10</sub>)</b> | <b>% error</b> |
|-----------------------------------------------------------------------------------------------|-------------|--------------------|----------------------------|-----------------------------|----------------|
| Null model (incl. subject)                                                                    | 0.053       | 8.392e -63         | -140.045                   | 0                           |                |
| camoType                                                                                      | 0.053       | 3.798e -57         | -127.022                   | 13.023                      | 0.833          |
| Background Type                                                                               | 0.053       | 4.670e -53         | -117.605                   | 22.44                       | 1.234          |
| camoType + Background Type                                                                    | 0.053       | 8.864e -46         | -100.847                   | 39.199                      | 1.036          |
| camoType + Background Type + camoType *<br>Background Type                                    | 0.053       | 1.073e -43         | -96.051                    | 43.995                      | 5.543          |
| task                                                                                          | 0.053       | 5.476e -41         | -89.815                    | 50.23                       | 1.986          |
| camoType + task                                                                               | 0.053       | 2.572e -31         | -67.545                    | 72.5                        | 6.419          |
| Background Type + task                                                                        | 0.053       | 5.185e -25         | -53.029                    | 87.017                      | 1.705          |
| camoType + Background Type + task                                                             | 0.053       | 1.276e -10         | -19.892                    | 120.154                     | 13.962         |
| camoType + Background Type + camoType *<br>Background Type + task                             | 0.053       | 2.232e -5          | -7.82                      | 132.226                     | 5.547          |
| camoType + task + camoType * task                                                             | 0.053       | 8.187e -32         | -68.69                     | 71.355                      | 1.616          |
| camoType + Background Type + task +<br>camoType * task                                        | 0.053       | 7.539e -11         | -20.418                    | 119.627                     | 4.09           |
| camoType + Background Type + camoType *<br>Background Type + task + camoType * task           | 0.053       | 2.063e -5          | -7.898                     | 132.147                     | 2.266          |
| Background Type + task + Background Type *<br>task                                            | 0.053       | 1.701e -22         | -47.235                    | 92.81                       | 3.129          |
| camoType + Background Type + task +<br>Background Type * task                                 | 0.053       | 4.531e -7          | -11.717                    | 128.329                     | 3.402          |
| camoType + Background Type + camoType *<br>Background Type + task + Background Type *<br>task | 0.053       | 0.395              | 2.464                      | 142.007                     | 10.364         |

|                                                                                                                                                        |       |           |         |         |       |
|--------------------------------------------------------------------------------------------------------------------------------------------------------|-------|-----------|---------|---------|-------|
| camoType + Background Type + task +<br>camoType * task + Background Type * task                                                                        | 0.053 | 4.365e -7 | -11.754 | 128.291 | 6.001 |
| camoType + Background Type + camoType *<br>Background Type + task + camoType * task +<br>Background Type * task                                        | 0.053 | 0.51      | 2.93    | 142.262 | 5.004 |
| camoType + Background Type + camoType *<br>Background Type + task + camoType * task +<br>Background Type * task + camoType *<br>Background Type * task | 0.053 | 0.095     | 0.638   | 140.583 | 2.707 |

---

*Note.* All models include subject.

**Analysis of Effects - dependent**

| Effects                           | P(incl) | P(incl   data) | Log(BF <sub>Inclusion</sub> ) |
|-----------------------------------|---------|----------------|-------------------------------|
| camoType                          |         | 1              | 35.707                        |
| Background Type                   |         | 1              | 35.707                        |
| task                              |         | 1              | 35.707                        |
| camoType * Background Type        |         | 1              | 14.705                        |
| camoType * task                   |         | 0.605          | 1.2                           |
| Background Type * task            |         | 1              | 10.829                        |
| camoType * Background Type * task |         | 0.095          | 0.638                         |

---

Table S2: Bayesian T-Test Analysis of Results.

| Task                          |                               |                            | Bayes Paired T-Test |            | Shapiro-Wilks |       |
|-------------------------------|-------------------------------|----------------------------|---------------------|------------|---------------|-------|
|                               |                               |                            | BF <sub>10</sub>    | error %    | W             | p     |
| <b>Locate</b>                 | <b>Matching Background</b>    |                            |                     |            |               |       |
|                               | uniform                       | - eeCamo                   | 94715.187           | 3.704e -11 | 0.929         | 0.117 |
|                               | uniform                       | - flatCamo                 | 0.838               | 9.273e -5  | 0.908         | 0.044 |
|                               | flatCamo                      | - eeCamo                   | 589.244             | 1.908e -9  | 0.958         | 0.452 |
|                               | <b>Contrasting Background</b> |                            |                     |            |               |       |
|                               | uniform                       | - eeCamo                   | 0.258               | 3.172e -4  | 0.878         | 0.011 |
|                               | uniform                       | - flatCamo                 | 0.225               | 3.094e -4  | 0.911         | 0.05  |
|                               | flatCamo                      | - eeCamo                   | 0.249               | 3.162e -4  | 0.94          | 0.194 |
|                               | <b>Classify</b>               | <b>Matching Background</b> |                     |            |               |       |
| uniform                       |                               | - eeCamo                   | 2389.892            | 6.886e -10 | 0.949         | 0.306 |
| uniform                       |                               | - flatCamo                 | 3.732               | 1.203e -5  | 0.974         | 0.798 |
| flatCamo                      |                               | - eeCamo                   | 1674.471            | 4.817e -10 | 0.979         | 0.9   |
| <b>Contrasting Background</b> |                               |                            |                     |            |               |       |
| uniform                       |                               | - eeCamo                   | 13.234              | 6.371e -6  | 0.962         | 0.532 |
| uniform                       |                               | - flatCamo                 | 0.302               | 3.126e -4  | 0.926         | 0.102 |
| flatCamo                      |                               | - eeCamo                   | 4.756               | 1.304e -5  | 0.969         | 0.688 |
